# Supplementary material
Source: publisher site journal article supplement (https://www.dovepress.com/article/265126)
Supplement: Supplementary file 1 [file get_supplementary_file.php]

**Supplemental material: DIABETES TREATMENT SURVEY**

**Instructions for Survey**

Thank you for taking the time to complete this survey. Over the next approximately 25-30 minutes, you will be asked some questions about your experience with diabetes, treatment preferences, and overall health and quality of life. You will also be asked to view two videos that present two different ways to inject diabetes medication and then provide your feedback.

There are no right or wrong answers to the questions you will be asked, as we are interested in your perspective. Your personal information like your name will not be collected and so your answers will be anonymous.

**GENERAL type 2 diabetes QUESTIONS (participant Completed)**

1. **When were you diagnosed with type 2 diabetes?** *[If years or months are unknown, please check the appropriate unknown box.]*

Year: ___________ Month: ___________

□ Number of Years are unknown.

□ Number of Months are unknown.

1. **Who diagnosed you with type 2 diabetes?** *[select only one response]*

□ General Practitioner

□ Internal Medicine Practitioner

□ Nurse Practitioner

□ Diabetologist

□ Endocrinologist

□ Other: (please list) ___________

□ I don’t remember

1. **When you were last tested, what was your blood sugar (HbA1c) level?** *[select only one response]*

□ Below 7% (Below 53 mmol/mol)

□ Between 7.1% and 8% (Between 54 mmol/mol and 64 mmol/mol)

□ Between 8.1% and 9% (Between 65 mmol/mol and 75 mmol/mol)

□ Higher than 9% (Higher than 75 mmol/mol)

□ I don’t know

1. **How much impact does your type 2 diabetes have on your life?** *[select only one response]*

□ No impact

□ Some impact

□ Moderate impact

□ Severe impact

□ Don’t know

1. **My type 2 diabetes impacts my ___________?** *[check all that apply]*

□ Work (e.g., completing job-related tasks)

□ Self-care (e.g., bathing or dressing yourself)

□ Family activities (e.g., spending time with family)

□ Social activities (e.g., spending time with friends)

□ Leisure activities (e.g., physical activity)

□ Relationships (e.g., marriage, friendships)

□ Emotions (e.g., anger, sadness)

□ Sexual desire (e.g., less sexual interest)

□ Eating (e.g., food choices, relationship with food, timing of eating)

□ Housekeeping (e.g., cleaning your house)

□ Other

□ None

1. **How much do you worry about your diabetes?** *[select only one response]*

□ Not at all

□ A little

□ A moderate amount

□ A great deal

1. **Have you had any of the following health conditions?** *[check all that apply]*

□ Angina

□ Anxiety

□ Arthritis

□ Cancer

□ High cholesterol

□ Chronic obstructive pulmonary disease/emphysema

□ Diabetic retinopathy

□ Heart attack or heart disease

□ Hypertension

□ Stroke

□Depression

□ Other health conditions

□ None

1. **Have you had any of the following diabetes complications?** *[check all that apply]*

□ Kidney complications

□ Eye complications

□ Blood circulation complications

□ Foot complications

□ Nerve complications

□ Other

□ None

1. **Would you be willing to take a diabetes medication that required an injection for each dose?** *[select only one response]*

□ Not willing

□ Somewhat not willing

□ Neutral

□ Somewhat willing

□ Very willing

**treatment questions (participant Completed)**

**10a. What do you do to treat your type 2 diabetes?** *[check all that apply]*

□ Medication *[Continue to 10b]*

□ Diet

□ Exercise *[If only diet and exercise options are selected, continue to 11]*

□ Nothing *[Continue to 11]*

**10b. Which of the following treatments are you currently receiving for your diabetes?**

*[select only one response]*

□ One oral diabetes medication

□ Two oral diabetes medications

□ Three or more oral diabetes medications

**10c. Choose up to 2 responses indicating what you like about your medication?**

□ Does control my blood sugar

□ Helps with weight loss

□ Easy to use

□ Few side effects

□ It is convenient

□ Cost

□ Other

□ There is nothing I like about my medication.

**10d. Choose up to 2 responses indicating what do you not like about your medication?**

□ Does not control my blood sugar

□ Not helpful with weight

□ Side effects

□ It is not convenient

□ Cost

□ Other

1. **How many times per year do you typically see a healthcare provider (like a doctor or nurse) to help manage your Type 2 Diabetes?**

___________ Times per year

1. **Which healthcare providers do you see to help manage your Type 2 Diabetes?** *[check all that apply]*

□ General Practitioner

□ Internal Medicine Practitioner

□ Nurse

□ Endocrinologist

□ Diabetologist

□ Pharmacist

□ Nutritionist

□ Other

1. **Which healthcare provider do you see most often to help manage your Type 2 Diabetes?** *[select only one response]*

□ General Practitioner

□ Internal Medicine Practitioner

□ Nurse

□ Endocrinologist

□ Diabetologist

□ Pharmacist

□ Nutritionist

□ Other

**14a. Some treatments for type 2 diabetes are injections. Do you ever have worries or**

**concerns about using an injectable medication?** *[select only one response]*

□ Yes *[Continue to 14b]*

□ No *[Continue to 15]*

**14b. What are the two most important reasons for these concerns?** *[select two responses]*

□ Injection pain

□ Irritation at injection site

□ Need to bring injection device when leaving the house

□ Inconvenience of traveling with injection device

□ Concerns about what others might think

□ Not having time for the injection process

□ Fear of needles

□ Fear of not injecting correctly

□ Concerns about the ability or dexterity to self-administer

□ Embarrassment

□ Other

**device questions (Interviewer Completed)**

**You will now watch two videos that present two different ways to inject diabetes medication. Then you will be asked about the devices presented in the videos. *[Randomization order of the videos will be programmed automatically within the electronic survey, and will be based on a random assignment method.]***

1. **What order did the participant watch the videos in?** *[select only one response]*

□ X followed by Y


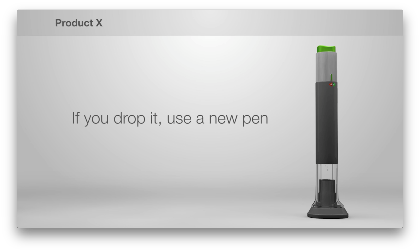

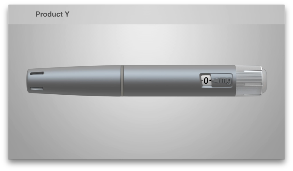


□ Y followed by X


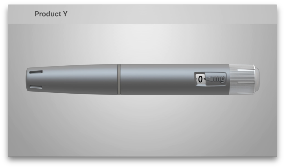

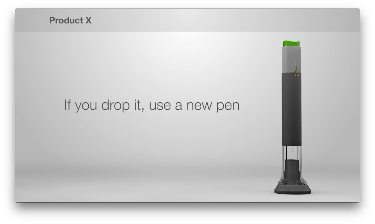


1. **Considering device X you watched in the video, how willing would you be to take this medication?** *[select only one response]*


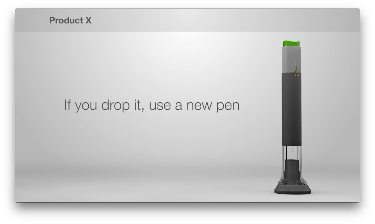


□ Not willing

□ Somewhat not willing

□ Neutral

□ Somewhat willing

□ Very willing

1. **Considering device Y you watched in the video, how willing would you be to take this medication?** *[select only one response]*


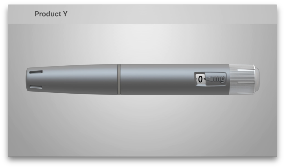


□ Not willing

□ Somewhat not willing

□ Neutral

□ Somewhat willing

□ Very willing

1. **Overall, which device do you prefer?** *[select only one response]*

□ **X** □ **Y** □ **No Preference**


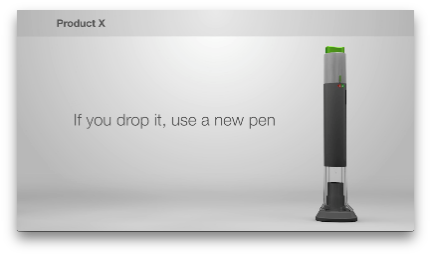

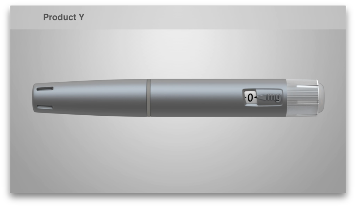


1. **What is the main reason for your preference indicated in the previous item (#18)?** *[select only one response]* *(Note to Programmers: Only ask if participant responds ‘X’ or ‘Y’ to #18).*

□ The device looked easy to use

□ The device design

□ The device needle

□ The number of doses in the device

□ The device storage

□ Other

**obesity questions (participant Completed)**

1. **What is your current height?**

/_______/ centimeters

□ Participant’s height is unknown.

1. **What is your current weight?**

_____ kilograms

□ Participant’s weight is unknown.

**22a. Does your weight impact your day-to-day activities?** *[select only one response]*

□ Yes *[Continue to 22b]*

□ No *[Continue to 23a]*

**22b. Please check which areas of your life are impacted by your weight.** *[check all that apply]*

□ Work (e.g., completing job-related tasks)

□ Self-care (e.g., bathing or dressing yourself)

□ Family activities (e.g., spending time with family)

□ Social activities (e.g., spending time with friends)

□ Leisure activities (e.g., physical activity)

□ Housekeeping (e.g., cleaning your house)

□ Other

**RAMADAN questions (participant Completed)**

**23a.** **Were there any days you were not able to fast from dawn to sundown during the last**

**Ramadan (2018)?**

□ Yes *[Continue to 23b]*

□ No *[Continue to 24]*

**23b. Approximately how many days were you unable to fast during the last Ramadan**

**(2018)?**

Enter number of days _________ (*Answer must be between 0 and 30*)

**24. Does fasting during Ramadan make you worry about your Type 2 Diabetes?** *[select only one response]*

□ Yes

□ No

**25. What steps do you take to prepare, if any, for your Type 2 Diabetes during Ramadan?** *[check all that apply]*

□ I talk to my physician and/or healthcare team about strategies for managing diabetes while fasting

□ Before starting the fast, I eat more food than I usually do

□ Before starting the fast, I eat different foods

□ I check my blood glucose levels more often than normal

□ I change my medication dose prior to Ramadan

□ I change my medication dose during Ramadan

□ I take medication at a different time of day

□ I change my medication to prepare for Ramadan

□ Reduce or limit activity

□ I don’t take any specific steps

□ Other

□ I don’t know
